# Supplementary material
Source: publisher figshare collection journal article supplement (https://tandf.figshare.com/ndownloader/files/17947022)
Supplement: Supplementary file 1 [file 17947022]

**Appendix 1. A summary of recordable ONIHL case selection**

| MSHA Injury Dataset |  | Selection Criteria (Description) | No. of Cases (Remained) |
| --- | --- | --- | --- |
| 1983-2014 All Reported Injury |  |  | 665376 |
| 1983-2014 Reported Hearing Loss |  | Nature of injury = hearing loss or impairment | 5027 |
| 1983-2014 Reported Operator Hearing Loss not from an Injury/Accident |  | Injury Class = Other injury or Illness | 4938 |
|  | Event Type = not else classified or unclassified | 4923 |
|  | Degree of injury = permanent disability, occupational illness, or all other unclassified | 4917 |
|  | Injury narrative does not indicate a sudden blast/ear injury | 4910 |
|  | Operator only, exclude contractor | 4864 |
| 2000-2014 Reported Operator Hearing Loss not from an Injury/Accident |  | Year = 2000-2014 | 1626 |
